# Supplementary material for: Interdisciplinary transition of care for congenital gastrointestinal malformations: analysis of a standardized program
Source: publisher site journal article supplement (doi:10.1515/ijamh-2025-0113), 2025-10-01
Supplement: Supplementary file 2 [file j_ijamh-2025-0113_suppl_001.docx]

| **Table 1b: Surgical procedures** | | |
| --- | --- | --- |
|  | **Surgery** | **n** |
| **EA** | Primary EEA | 21 |
| EEA + fundoplication | 3 |
| Gastric pull up | 3 |
| Dilatation | 1 |
| **ARM/HD** | PSARP/PSARVP/PSARVUP | 13 |
| Rehbein | 1 |
| Duhamel | 1 |
| de la Torre | 4 |
| **Combined** | Fistula Closure + PSARP | 1 |
| Primary EEA + PSARP | 8 |
| Primary EEA + fundoplication + PSARP | 1 |
| Primary EEA + colostomy + Mitrofanoff | 1 |
| **Other** | Colectomy + J-pouch | 1 |
| Segmental resection of jejunum | 1 |
| Ileus surgery + herniotomies | 1 |
| Abdominal closure | 1 |
| None | 1 |

EA: Esophageal atresia; ARM: Anorectal malformations; HD: Hirschsprungs’ disease; Combined: EA + ARM/HD; EEA: end-to-end anastomosis; PSARP: posterior sagittal anorectoplasty; PSARVP: posterior sagittal anorectovaginoplasty; PSARVUP: posterior sagittal anorectal vaginal urethroplasty.

| Table 4: Average WHO-scores of patients, detailed by pathology and visit number. Only patients who attended both first and second visits were included. | | | | | |
| --- | --- | --- | --- | --- | --- |
|  | **Visit 1** | **Visit 2** | **p1 (vs. healthy)** | **p2 (vs. healthy)** | **p2 (vs. Visit 1)** |
| **All** | 16.65 | 16.45 | 0.061 | 0.097 | 0.857 |
| **EA** | 16.50 | 14.75 | 0.163 | 0.073 | 0.343 |
| **ARM/HD** | 16.88 | 16.75 | 0.423 | 0.433 | 0.950 |
| **Combined** | 16.50 | 19.25 | 0.317 | 0.579 | 0.151 |

| **Table 5: Average GIQLI-scores of patients, detailed by pathology and visit number. Only patients who attended both first and second visits were included.** | | | | | |
| --- | --- | --- | --- | --- | --- |
|  | **Visit 1** | **Visit 2** | **p1 (vs. healthy)** | **p2 (vs. healthy)** | **p2 (vs. Visit 1)** |
| **All** | 112.55 | 111.55 | 0.004 | 0.012 | 0.849 |
| **EA** | 116.63 | 117.00 | 0.16 | 0.272 | 0.961 |
| **ARM/HD** | 111.63 | 108.13 | 0.045 | 0.075 | 0.692 |
| **Combined** | 106.25 | 107.50 | 0.140 | 0.215 | 0.922 |
